# Supplementary material for: Spin splitting and reemergence of charge compensation in monolayer WTe2by 3d transition-metal adsorption
Source: Royal Society of Chemistry journal article supplement (doi:10.1039/c7cp00723j), 2017-01-01
Supplement: c7cp00723j1.pdf [file c7cp00723j1.pdf]

## Supplementary Information

### Spin splitting and reemergence of charge compensation in monolayer WTe<sub>2</sub> by 3d transition-metal adsorption

Yan Song,<sup>a</sup> Xiaocha Wang<sup>b</sup> and Wenbo Mi<sup>\*a</sup>

<sup>a</sup>Tianjin Key Laboratory of Low Dimensional Materials Physics and Preparation Technology,  
School of Science, Tianjin University, Tianjin 300354, China

<sup>b</sup>School of Electronics Information Engineering, Tianjin University of Technology, Tianjin 300384,  
China

#### Contents:

**S1. Band folding of monolayer WTe<sub>2</sub>**

**S2. Effects of SOC and Coulomb interaction on band structure of Mn-WTe<sub>2</sub>**

**S3. Effects of SOC and Coulomb interaction on charge density of Mn-WTe<sub>2</sub>**

**S4. Effects of SOC and Coulomb interaction on band structure of Ni-WTe<sub>2</sub>**

**S5. Orbital-resolved density of states for pristine monolayer WTe<sub>2</sub>**

---

\*Author to whom all correspondence should be addressed.

E-mail: [miwenbo@tju.edu.cn](mailto:miwenbo@tju.edu.cn)

## S1. Band folding of monolayer WTe<sub>2</sub>

The relation between wave vectors  $\mathbf{k}$  and  $\mathbf{k}'$  can be obtained via the translational symmetry operation, which is given by

$$\mathbf{k}' = \mathbf{k} \pm n\mathbf{b}'_1 \pm m\mathbf{b}'_2 \quad (1)$$

where  $\mathbf{k}$  and  $\mathbf{k}'$  represent the vectors of the primitive cell and the supercell respectively,  $\mathbf{b}'_1$  and  $\mathbf{b}'_2$  are the reciprocal-lattice vectors of the supercell,  $n$  and  $m$  are the integer numbers. In monolayer WTe<sub>2</sub>, the basic vectors of the primitive cell  $\mathbf{a}_1$  and  $\mathbf{a}_2$  as indicated by the red arrows in Fig. 1(a) are expressed as

$$\mathbf{a}_1 = (a_1, 0), \mathbf{a}_2 = (0, a_2) \quad (2)$$

where  $a_1$  and  $a_2$  are the lattice constants of the primitive cell. The basic vectors of the supercell  $\mathbf{a}'_1$  and  $\mathbf{a}'_2$  as indicated by the blue arrows in Fig. 1(a) are expressed as

$$\mathbf{a}'_1 = (3a_1, 0), \mathbf{a}'_2 = (0, 2a_2) \quad (3)$$

Thereby, the reciprocal-lattice vectors for the primitive cell and the supercell are obtained, respectively

$$\mathbf{b}_1 = \left(\frac{2\pi}{a_1}, 0\right), \mathbf{b}_2 = \left(0, \frac{2\pi}{a_2}\right) \quad (4)$$

$$\mathbf{b}'_1 = \left(\frac{2\pi}{3a_1}, 0\right), \mathbf{b}'_2 = \left(0, \frac{\pi}{a_2}\right) \quad (5)$$

Hence, based on the reciprocal-lattice vectors, the coordinates of the high symmetry points of the primitive cell are expressed as

$$\Gamma = (0,0), X = \left(\frac{\pi}{a_1}, 0\right) \quad (6)$$

$$Y = \left(0, \frac{\pi}{a_2}\right), S = \left(\frac{\pi}{a_1}, \frac{\pi}{a_2}\right) \quad (7)$$

The high symmetry points of the supercell are expressed as

$$\Gamma' = (0,0), X' = \left(\frac{\pi}{3a_1}, 0\right) \quad (8)$$

$$Y' = \left(0, \frac{\pi}{2a_2}\right), S' = \left(\frac{\pi}{3a_1}, \frac{\pi}{2a_2}\right) \quad (9)$$

Under equation (1), we get

$$X - \mathbf{b}'_1 = X' \quad (10)$$

$$Y - \mathbf{b}'_2 = \Gamma' \quad (11)$$

$$S - \mathbf{b}'_1 - \mathbf{b}'_2 = X' \quad (12)$$

Hence,  $X$  and  $S$  points of the primitive cell are folded to  $X'$  point of the supercell and the  $Y$  point is folded to  $\Gamma'$  point.

## S2. Effects of SOC and Coulomb interaction on band structure of Mn-WTe<sub>2</sub>

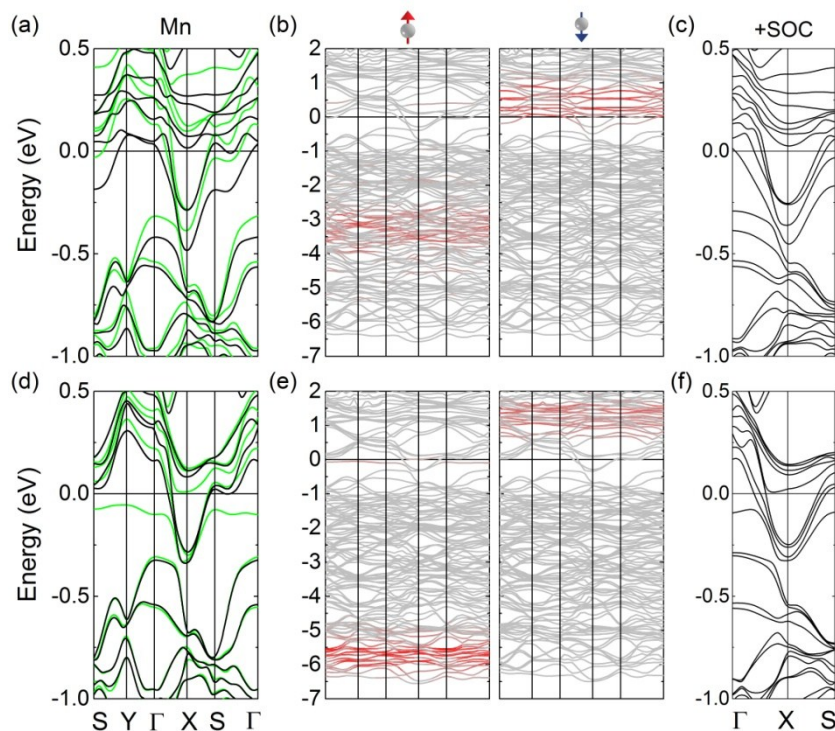

**Fig. S1** Band structures of Mn-adsorbed monolayer without (a)-(c) and with (d)-(f) Coulomb interaction. Green and black are used to denote the spin up and spin down bands. Red represents the Mn component (red: 100%, light gray: 0%). (d) and (h) are bands with inclusion of SOC.

### S3. Effects of SOC and Coulomb interaction on charge density of Mn-WTe<sub>2</sub>

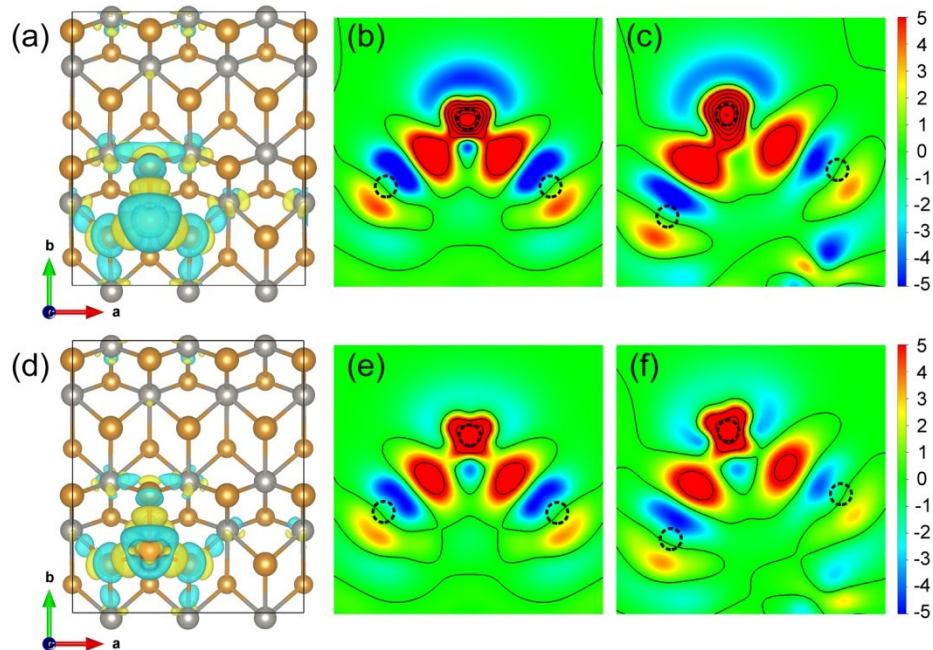

**Fig. S2** Top views and 2D contours of the charge density difference for Mn-adsorbed WTe<sub>2</sub> without (a)-(c) and with (d)-(f) Coulomb interaction. Yellow (blue) region in (a) and (d) represents net charge gain (loss). In 2D contours, charge gain and loss are depicted as the color scale.

#### S4. Effects of SOC and Coulomb interaction on band structure of Ni-WTe<sub>2</sub>

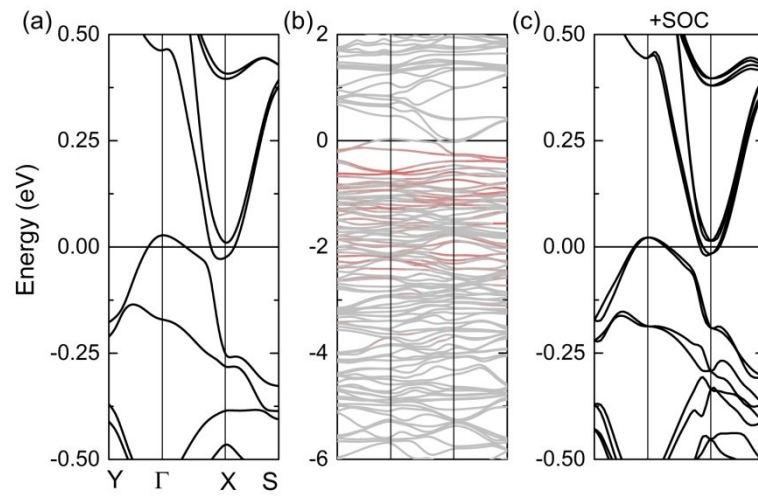

**Fig. S3** Band structures of Ni-adsorbed WTe<sub>2</sub> with Coulomb interaction. Red represents the Ni component (red: 100%, light gray: 0%).

## S5. Orbital-resolved density of states for pristine monolayer WTe<sub>2</sub>

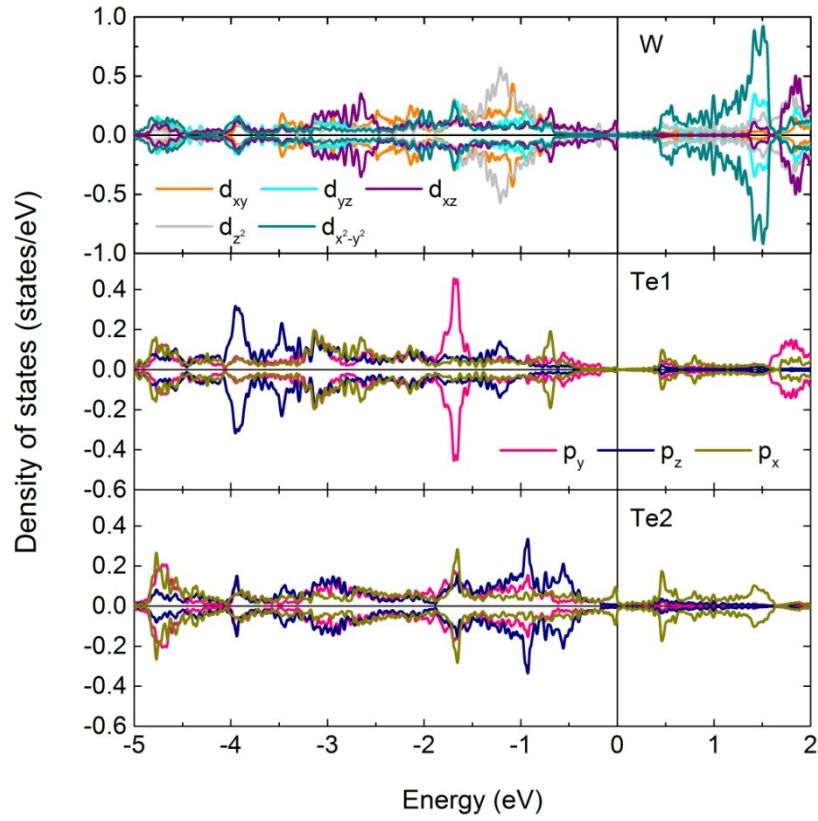

**Fig. S4** Orbital-resolved density of states for pristine monolayer WTe<sub>2</sub>.
